# Supplementary material
Source: ML conference proceedings conference paper supplement (https://openaccess.thecvf.com/content/ACCV2020/html/Navasardyan_Image_Inpainting_with_ACCV_2020_paper.html)
Supplement: Supplementary file 1 [file Navasardyan_Image_Inpainting_with_ACCV_2020_supplemental.pdf]

# Appendix

Shant Navasardyan<sup>1</sup>[0000–0002–1999–9999] and Marianna  
Ohanyan<sup>2</sup>[0000–0002–4815–3802]

<sup>1</sup> Picsart Inc., Armenia, Yerevan [shant.navasardyan@picsart.com](mailto:shant.navasardyan@picsart.com)

<sup>2</sup> Picsart Inc., Armenia, Yerevan [marianna.ohanyan@picsart.com](mailto:marianna.ohanyan@picsart.com)

## 1 Details on Network Architecture

Here we describe the architectures of our networks in detail. Our generator network is composed of two parts, coarse and refinement. Let for the original image  $I \in \mathbb{R}^{H \times W \times 3}$  and the binary mask  $M \in \{0, 1\}^{H \times W}$  the input of the coarse network be  $I_m = (1 - M) \odot I$ . The architecture of the coarse network can be found in the Table 1.

Let  $I_c$  be the output of the coarse model. Then we feed the refinement network by the image  $I_{c\_comp} = (1 - M) \odot I + M \odot I_c$ . The architecture of the refinement network can be found in Table 2.

Let the output of the refinement network be  $I_r$ . Then we consider the image  $I_{comp} = (1 - M) \odot I + M \odot I_r$  and pass it through the discriminator. The architecture of the discriminator is presented in the Table 3.

## 2 More Visual Results

In this section we provide more results of our method and compare it with the methods [1, 4]. In Fig. 3 and Fig. 4 a part of the filled region is zoomed to show the difference between the methods. In Fig. 5 and Fig. 6 more images are shown for comparison. In Fig. 2 more images completed with our method are shown. In Fig. 1 high resolution ( $512 \times 512$ ) completed images are shown.

## References

1. Liu, G., Reda, F.A., Shih, K.J., Wang, T.C., Tao, A., Catanzaro, B.: Image inpainting for irregular holes using partial convolutions. In: ECCV. (2018)
2. Clevert, D.A., Unterthiner, T., Hochreiter, S.: Fast and accurate deep network learning by exponential linear units (elus). CoRR **abs/1511.07289** (2015)
3. Yu, J., Lin, Z., Yang, J., Shen, X., Lu, X., Huang, T.S.: Generative image inpainting with contextual attention. In: 2018 IEEE/CVF Conference on Computer Vision and Pattern Recognition. (2018) 5505–5514
4. Yu, J., Lin, Z., Yang, J., Shen, X., Lu, X., Huang, T.: Free-form image inpainting with gated convolution. In: 2019 IEEE/CVF International Conference on Computer Vision (ICCV). (2019) 4470–4479

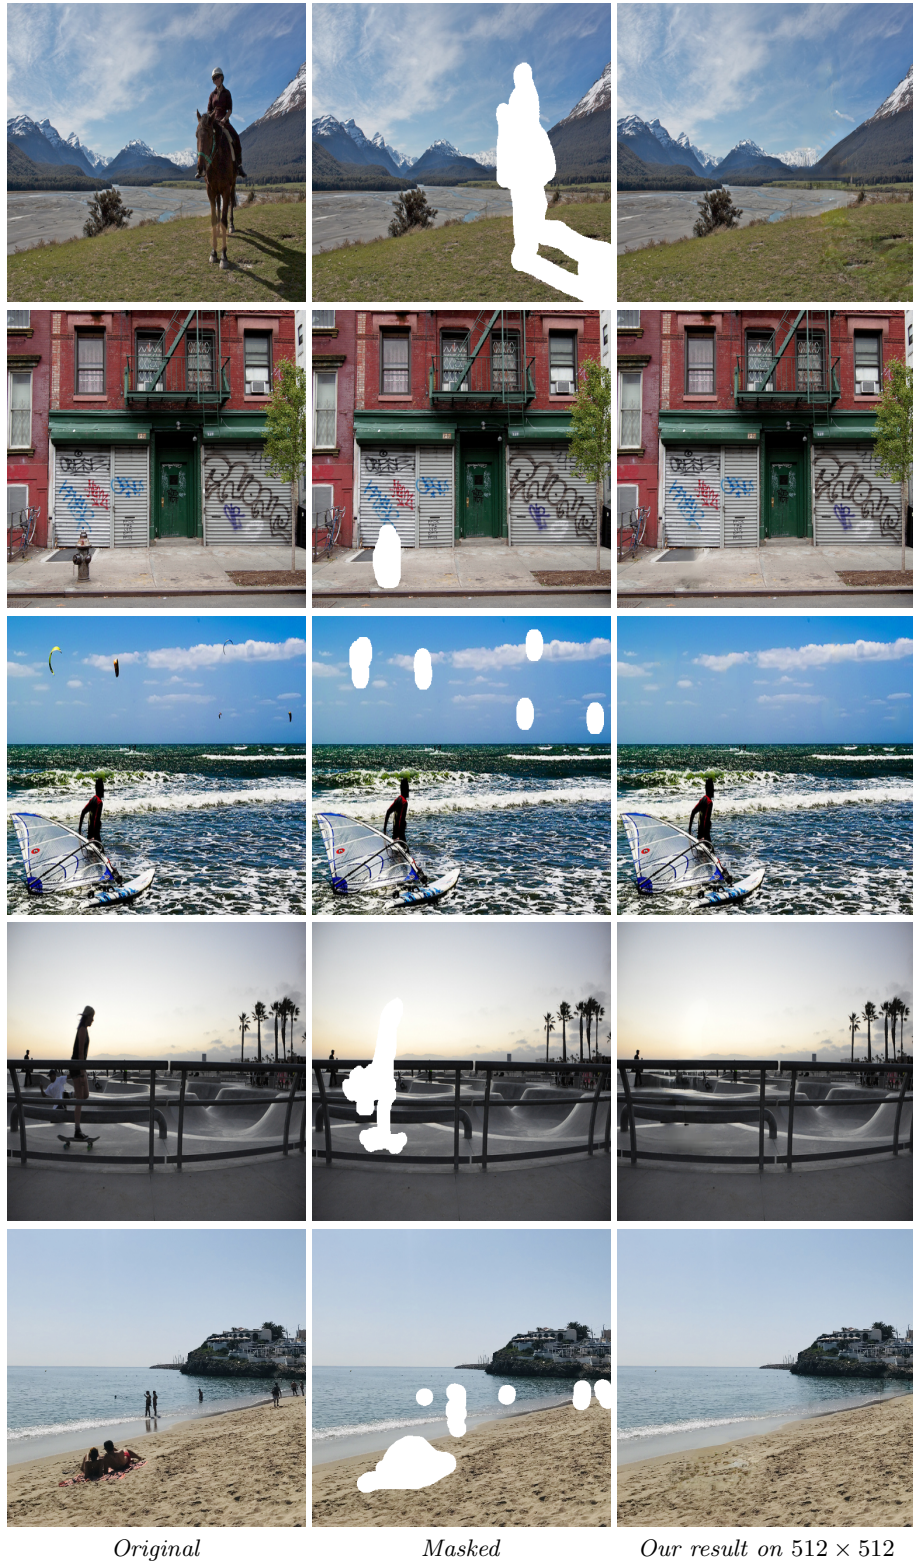

**Fig. 1.** Results of our method on high resolution.

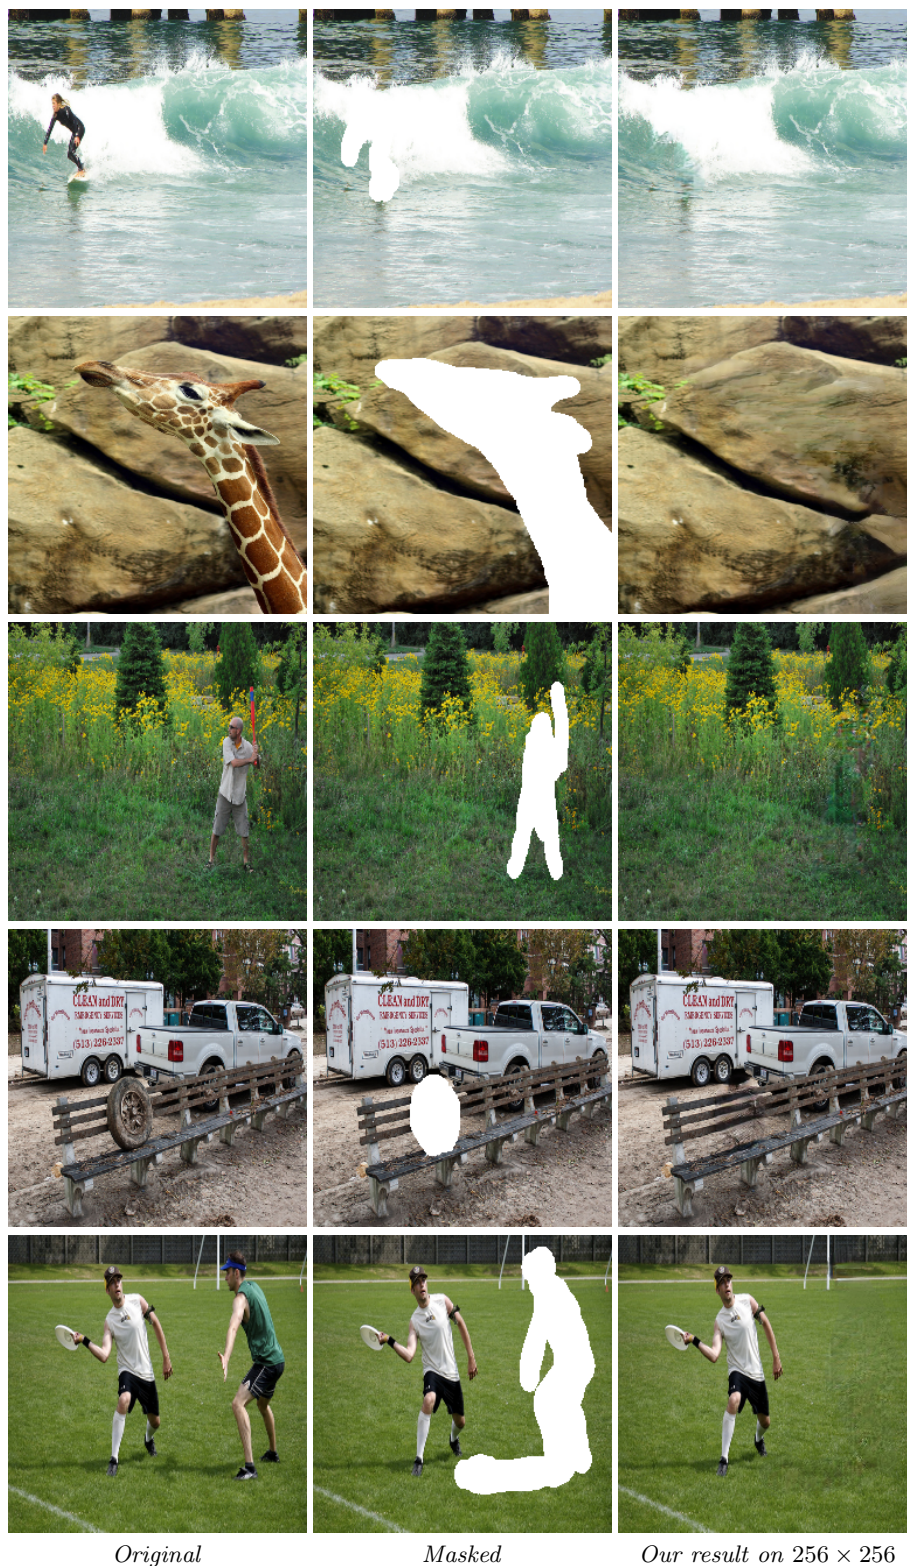**Fig. 2.** Results of our method.

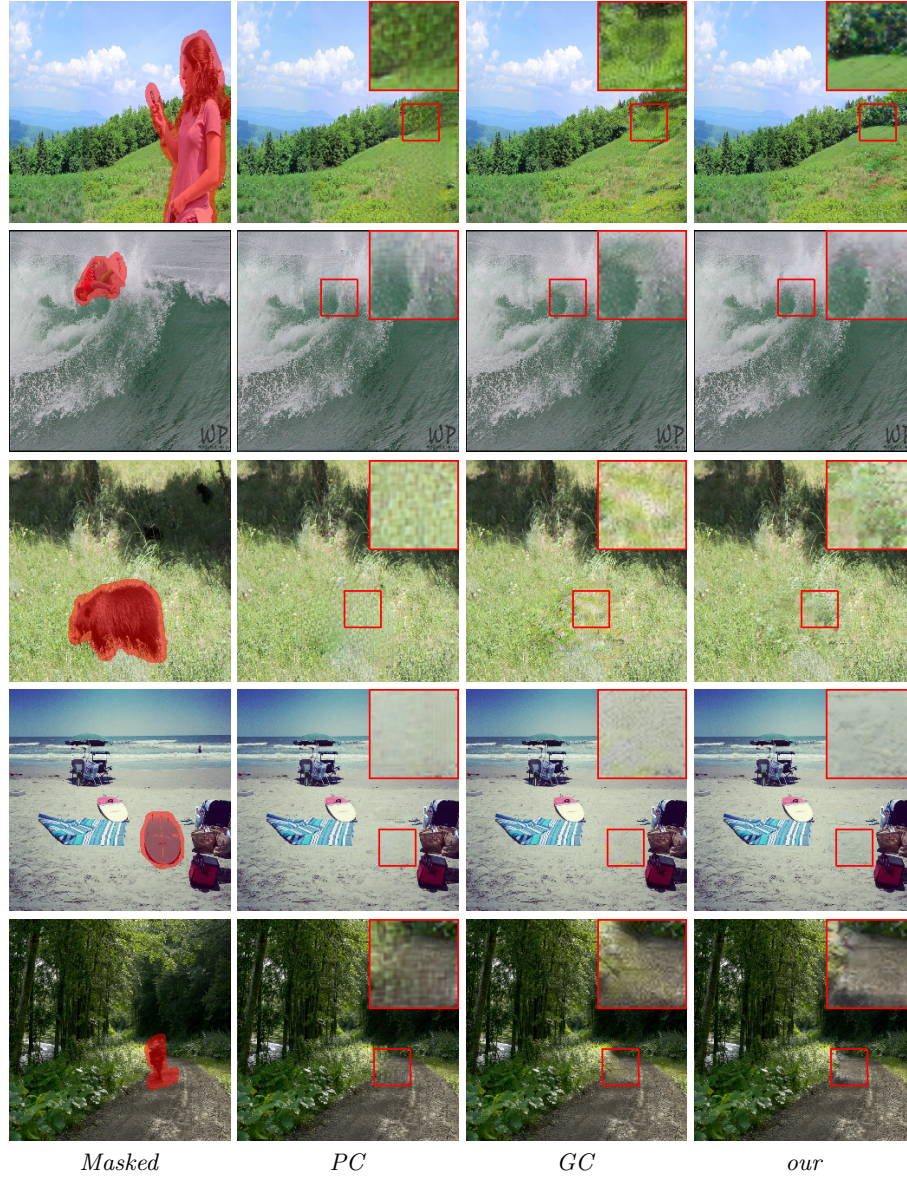

**Fig. 3.** Zoomed comparisons of our method with PC [1] and GC [4].



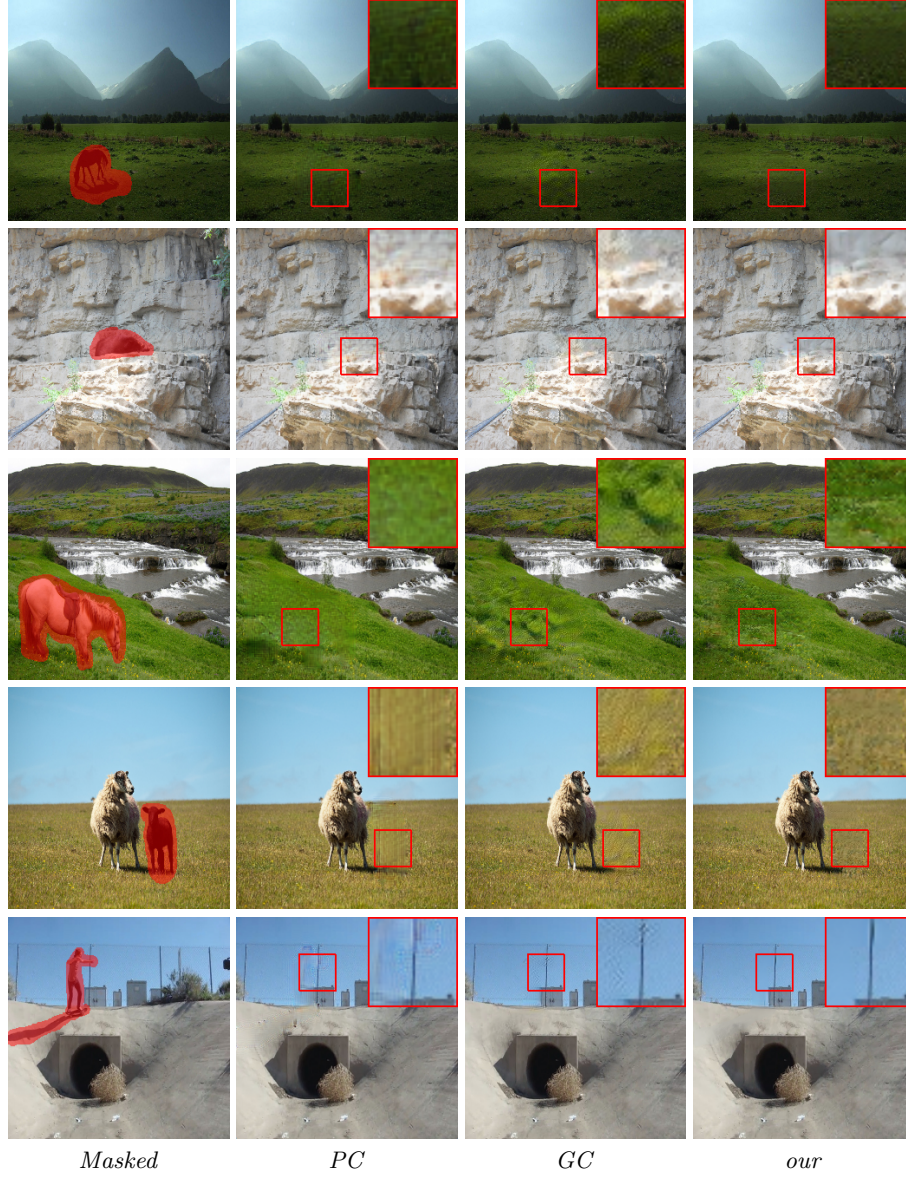

**Fig. 4.** Zoomed comparisons of our method with PC [1] and GC [4].

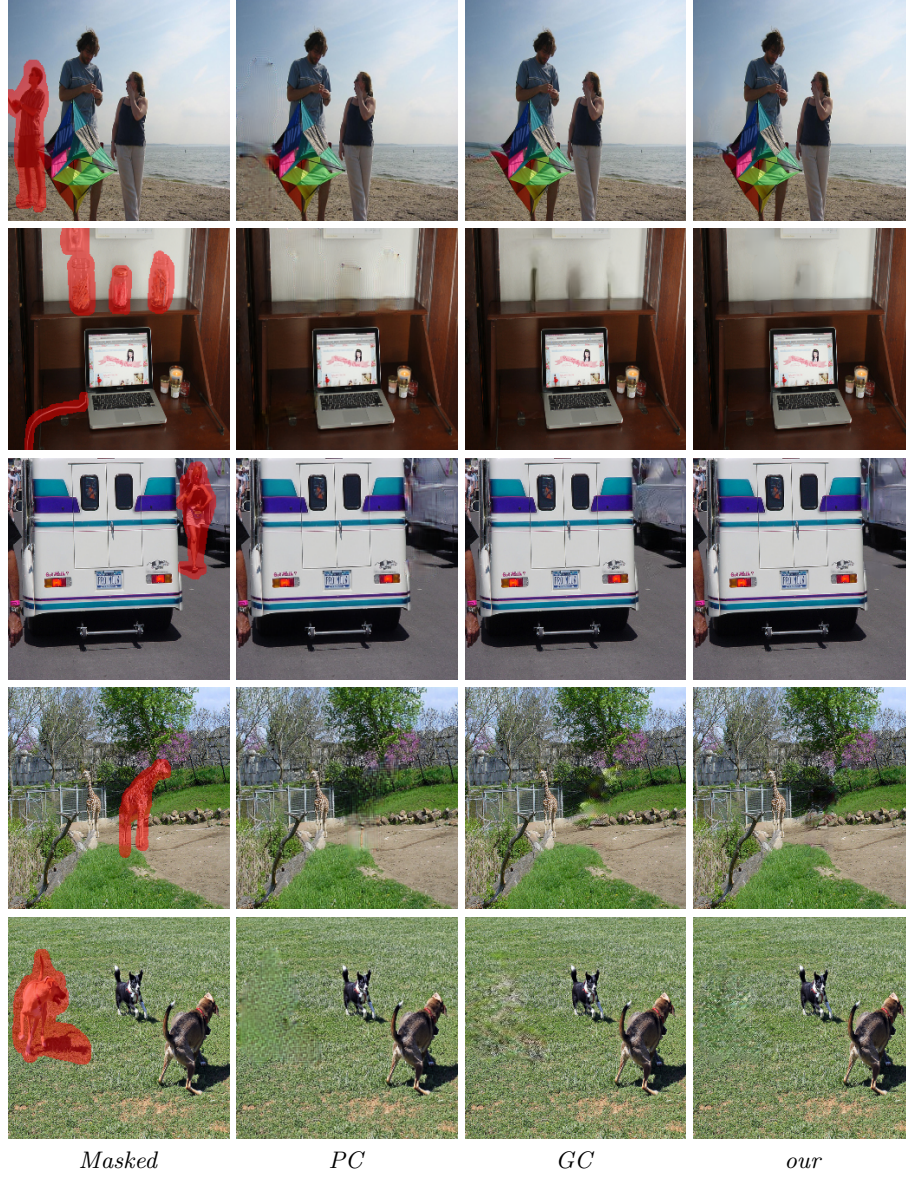

**Fig. 5.** Comparisons of our method with PC [1] and GC [4].



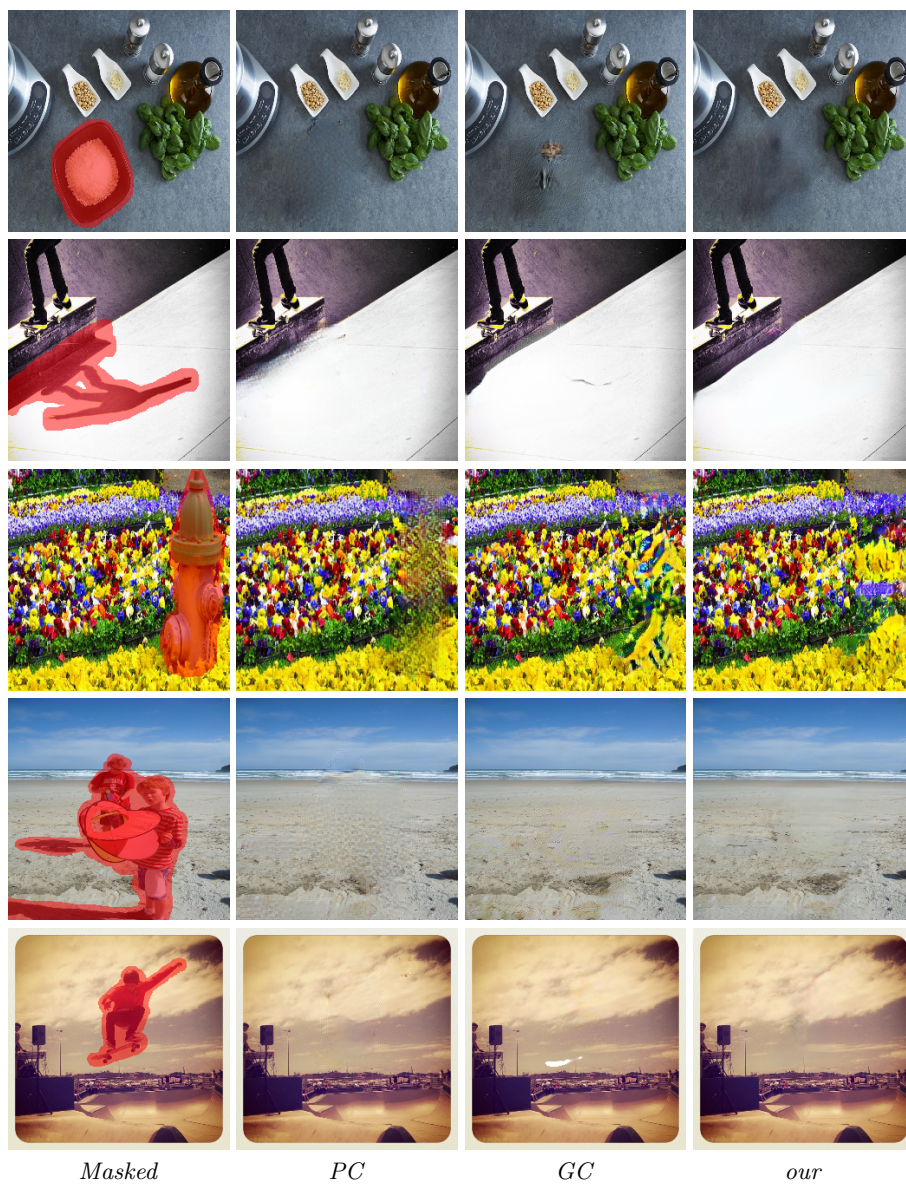

**Fig. 6.** Comparisons of our method with PC [1] and GC [4].

**Table 1.** The architecture of our coarse network. PConv\_x denotes partial convolution layers [1]. *ELU* denotes the *Exponential Linear Unit* [2]. Conv\_x is a convolution block composed of a convolution and a non-linearity. ConvUp\_x is denoted a block composed of a nearest neighbor upsampling followed by a convolution and a non-linearity. All paddings are of the type “same”. The parameter  $T = \infty$  means that we iteratively fill missing region peels until the missing region is filled completely.

| Layer Name | Parameters                                                                                       |
|------------|--------------------------------------------------------------------------------------------------|
| PConv_1    | $filters = 48, ksize = 5, strides = 1, activation = ELU$                                         |
| PConv_2    | $filters = 96, ksize = 3, strides = 2, activation = ELU$                                         |
| PConv_3    | $filters = 96, ksize = 3, strides = 1, activation = ELU$                                         |
| PConv_4    | $filters = 192, ksize = 3, strides = 2, activation = ELU$                                        |
| PConv_5    | $filters = 192, ksize = 3, strides = 1, activation = ELU$                                        |
| PConv_6    | $filters = 192, ksize = 3, strides = 1, activation = ELU$                                        |
| Onion_Conv | $d = 8, k_f = 2, k_m = 4, T = \infty, filters = 96,$<br>$k_c = 3, strides = 1, activation = ELU$ |
| Conv_7     | $filters = 192, ksize = 3, strides = 2, activation = ELU$                                        |
| Conv_8     | $filters = 192, ksize = 3, strides = 1, activation = ELU$                                        |
| Conv_9     | $filters = 192, ksize = 3, strides = 1, activation = ELU$                                        |
| Conv_10    | $filters = 192, ksize = 3, strides = 2, activation = ELU$                                        |
| Conv_11    | $filters = 192, ksize = 3, strides = 1, activation = ELU$                                        |
| Conv_12    | $filters = 192, ksize = 3, strides = 1, activation = ELU$                                        |
| ConvUp_13  | $filters = 192, ksize = 3, activation = ELU$                                                     |
| Conv_14    | $filters = 192, ksize = 3, strides = 1, activation = ELU$                                        |
| ConvUp_15  | $filters = 192, ksize = 3, activation = ELU$                                                     |
| Conv_16    | $filters = 192, ksize = 3, strides = 1, activation = ELU$                                        |
| ConvUp_17  | $filters = 96, ksize = 3, activation = ELU$                                                      |
| Conv_18    | $filters = 96, ksize = 3, strides = 1, activation = ELU$                                         |
| ConvUp_19  | $filters = 48, ksize = 3, activation = ELU$                                                      |
| Conv_20    | $filters = 24, ksize = 3, strides = 1, activation = ELU$                                         |
| Conv_21    | $filters = 3, ksize = 3, strides = 1$                                                            |
| Tanh       |                                                                                                  |



**Table 2.** The architecture of the refinement network. All paddings are of the type “same”. *ReLU* denotes the *Rectified Linear Unit*. ContextAtt is the contextual attention layer [3].

| Layer Name         | Parameters                                                           |
|--------------------|----------------------------------------------------------------------|
| Conv_22            | $filters = 48, ksize = 5, strides = 1, activation = ELU$             |
| Conv_23            | $filters = 48, ksize = 3, strides = 2, activation = ELU$             |
| Conv_24            | $filters = 96, ksize = 3, strides = 1, activation = ELU$             |
| Conv_25            | $filters = 96, ksize = 3, strides = 2, activation = ELU$             |
| Conv_26            | $filters = 192, ksize = 3, strides = 1, activation = ELU$            |
| Conv_27            | $filters = 192, ksize = 3, strides = 1, activation = ELU$            |
| Conv_28            | $filters = 192, ksize = 3, strides = 1, rate = 2, activation = ELU$  |
| Conv_30            | $filters = 192, ksize = 3, strides = 1, rate = 4, activation = ELU$  |
| Conv_31            | $filters = 192, ksize = 3, strides = 1, rate = 8, activation = ELU$  |
| Conv_32            | $filters = 192, ksize = 3, strides = 1, rate = 16, activation = ELU$ |
| Conv_33 (on input) | $filters = 48, ksize = 5, strides = 1, activation = ELU$             |
| Conv_34            | $filters = 48, ksize = 3, strides = 2, activation = ELU$             |
| Conv_35            | $filters = 96, ksize = 3, strides = 1, activation = ELU$             |
| Conv_36            | $filters = 192, ksize = 3, strides = 2, activation = ELU$            |
| Conv_37            | $filters = 192, ksize = 3, strides = 1, activation = ELU$            |
| Conv_38            | $filters = 192, ksize = 3, strides = 1, activation = ReLU$           |
| ContextAtt         | $filters = 192, ksize = 3, strides = 1, rate = 2$                    |
| Conv_39            | $filters = 192, ksize = 3, strides = 1, activation = ELU$            |
| Conv_40            | $filters = 192, ksize = 3, strides = 1, activation = ELU$            |
| Concat (w Conv_32) |                                                                      |
| Conv_41            | $filters = 192, ksize = 3, strides = 1, activation = ELU$            |
| Conv_42            | $filters = 192, ksize = 3, strides = 1, activation = ELU$            |
| ConvUp_40          | $filters = 96, ksize = 3, activation = ELU$                          |
| Conv_41            | $filters = 96, ksize = 3, strides = 1, activation = ELU$             |
| ConvUp_42          | $filters = 48, ksize = 3, activation = ELU$                          |
| Conv_43            | $filters = 24, ksize = 3, strides = 1, activation = ELU$             |
| Conv_44            | $filters = 3, ksize = 3, strides = 1, activation = ELU$              |
| Tanh               |                                                                      |

**Table 3.** The architecture of the discriminator SNPatchGAN [4]. SConv\_x denotes the convolution layer with a spectral normalization and a non-linearity. *LReLU* denotes the *Leaky Rectified Linear Unit* with a slope 0.2.

| Layer Name | Parameters                                                  |
|------------|-------------------------------------------------------------|
| SConv_1    | $filters = 64, ksize = 5, strides = 2, activation = LReLU$  |
| SConv_2    | $filters = 128, ksize = 5, strides = 2, activation = LReLU$ |
| SConv_3    | $filters = 256, ksize = 5, strides = 2, activation = LReLU$ |
| SConv_4    | $filters = 256, ksize = 5, strides = 2, activation = LReLU$ |
| SConv_5    | $filters = 256, ksize = 5, strides = 2, activation = LReLU$ |
| SConv_6    | $filters = 256, ksize = 5, strides = 2, activation = LReLU$ |
